# Supplementary material for: Observation of covalent and electrostatic bonds in nitrogen-containing polycyclic ions formed by gas phase reactions of the benzene radical cation with pyrimidine
Source: Royal Society of Chemistry journal article supplement (doi:10.1039/c6cp08731k), 2017-01-01
Supplement: c6cp08731k1.pdf [file c6cp08731k1.pdf]

## Observation of Covalent and Electrostatic Bonds in Nitrogen-Containing Polycyclic Ions Formed by Gas Phase Reactions of the Benzene Radical Cation with Pyrimidine

Isaac Kwame Attah, Abdel-Rahman Soliman, Sean P. Platt, Michael Meot-Ner (Mautner),  
Saaudallah G. Aziz,<sup>a</sup> and M. Samy El-Shall\*

### Supplementary Information

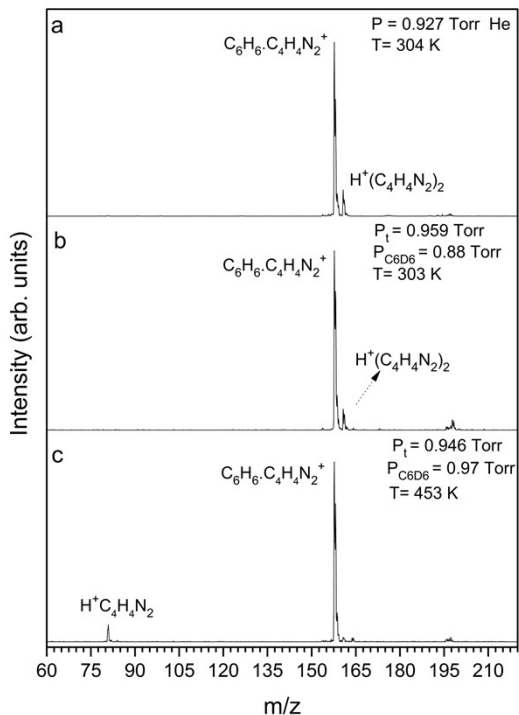

**Figure S1.** Lack of ligand exchange reactions of the  $(C_6H_6.C_4H_4N_2)^{++}$  dimer injected into  $C_6D_6/He$  at the pressures and temperatures as indicated. Ligand exchange could yield  $(C_6D_6.C_6H_6)^{++}$  ( $m/z$  162) or  $(C_4H_4N_2.C_6D_6)^{++}$  ( $m/z$  164) which are not observed.

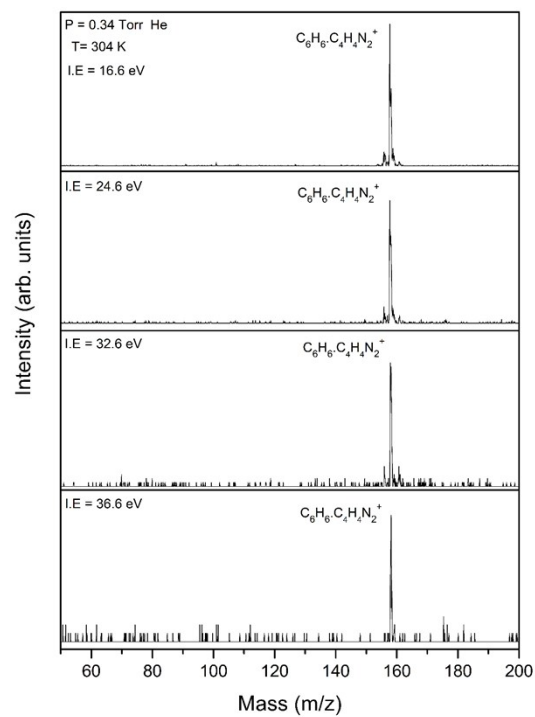

**Figure S2:** Stability of the  $(C_6H_6.C_4H_4N_2)^+$  dimer against collisional dissociation upon injection into the mobility cell. Mass Spectra show no fragmentation at the injection energies (I.E) indicated (lab frame).
